# Supplementary material
Source: Research Square preprint supplement (doi:10.21203/rs.3.rs-8763095/v1)

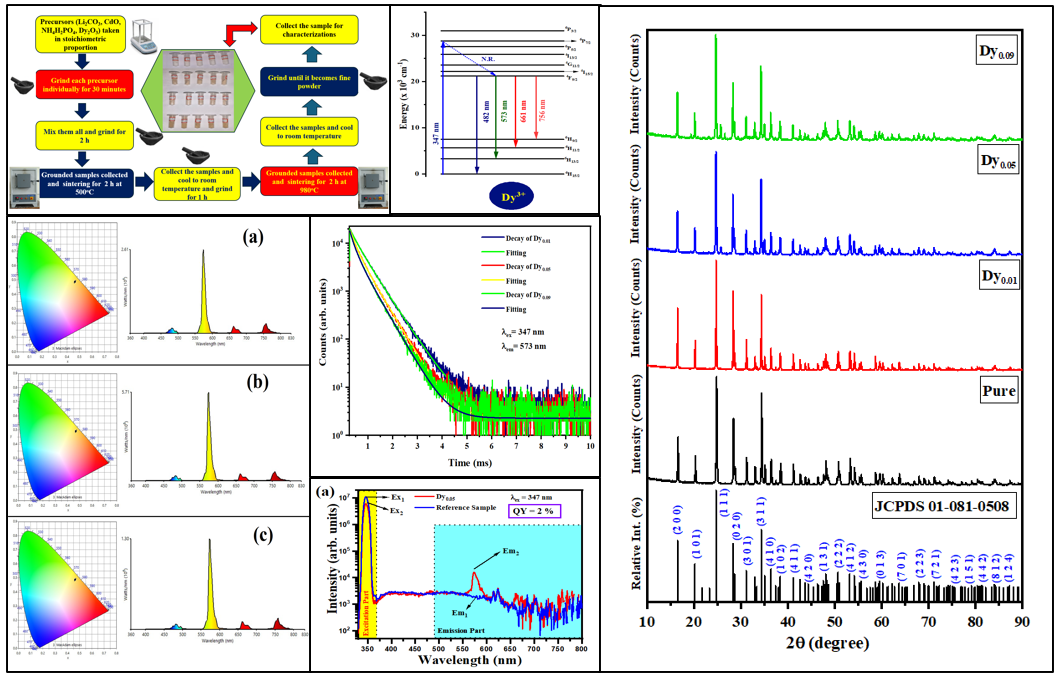

Supplement: Supplementary file 1 [file 3ca38404f54c65af8949961f.docx]
